# Supplementary material for: Effect of Thiamine Supplementation on Mortality in Septic Patients: A Meta-Analysis of Randomized Controlled Trials
Source: Research Square preprint supplement (doi:10.21203/rs.3.rs-6639223/v1), 2025-06-10
Supplement: Supplementary file 1 [file 4365f8f1f6224a575f2e5550.docx]

| **Section and Topic** | **Item #** | **Checklist item** | **Location where item is reported** |
| --- | --- | --- | --- |
| **TITLE** | | |  |
| Title | 1 | Identify the report as a systematic review. | Title Page |
| **ABSTRACT** | | |  |
| Abstract | 2 | See the PRISMA 2020 for Abstracts checklist. | Abstract section |
| **INTRODUCTION** | | |  |
| Rationale | 3 | Describe the rationale for the review in the context of existing knowledge. | Introduction section,Paragraphs 1-2 |
| Objectives | 4 | Provide an explicit statement of the objective(s) or question(s) the review addresses. | Introduction section,End Paragraph |
| **METHODS** | | |  |
| Eligibility criteria | 5 | Specify the inclusion and exclusion criteria for the review and how studies were grouped for the syntheses. | Methods section, “Inclusion and Exclusion Criteria” |
| Information sources | 6 | Specify all databases, registers, websites, organisations, reference lists and other sources searched or consulted to identify studies. Specify the date when each source was last searched or consulted. | Methods section, “Search Strategy” |
| Search strategy | 7 | Present the full search strategies for all databases, registers and websites, including any filters and limits used. | Additional_File_2_Search_Strategy |
| Selection process | 8 | Specify the methods used to decide whether a study met the inclusion criteria of the review, including how many reviewers screened each record and each report retrieved, whether they worked independently, and if applicable, details of automation tools used in the process. | Methods section, “Data Extraction and Quality Assessment” |
| Data collection process | 9 | Specify the methods used to collect data from reports, including how many reviewers collected data from each report, whether they worked independently, any processes for obtaining or confirming data from study investigators, and if applicable, details of automation tools used in the process. | Methods section, “Data Extraction and Quality Assessment” |
| Data items | 10a | List and define all outcomes for which data were sought. Specify whether all results that were compatible with each outcome domain in each study were sought (e.g. for all measures, time points, analyses), and if not, the methods used to decide which results to collect. | Methods section, “Statistical Analysis” |
| 10b | List and define all other variables for which data were sought (e.g. participant and intervention characteristics, funding sources). Describe any assumptions made about any missing or unclear information. | Methods section, “Data Extraction and Quality Assessment” |
| Study risk of bias assessment | 11 | Specify the methods used to assess risk of bias in the included studies, including details of the tool(s) used, how many reviewers assessed each study and whether they worked independently, and if applicable, details of automation tools used in the process. | Methods section, “Data Extraction and Quality Assessment” |
| Effect measures | 12 | Specify for each outcome the effect measure(s) (e.g. risk ratio, mean difference) used in the synthesis or presentation of results. | Methods section, “Statistical Analysis” |
| Synthesis methods | 13a | Describe the processes used to decide which studies were eligible for each synthesis (e.g. tabulating the study intervention characteristics and comparing against the planned groups for each synthesis (item #5)). | Methods section, “Statistical Analysis” |
| 13b | Describe any methods required to prepare the data for presentation or synthesis, such as handling of missing summary statistics, or data conversions. | Methods section, “Statistical Analysis” |
| 13c | Describe any methods used to tabulate or visually display results of individual studies and syntheses. | Methods section, “Statistical Analysis” + Figures 3-5 |
| 13d | Describe any methods used to synthesize results and provide a rationale for the choice(s). If meta-analysis was performed, describe the model(s), method(s) to identify the presence and extent of statistical heterogeneity, and software package(s) used. | Methods section, “Statistical Analysis” |
| 13e | Describe any methods used to explore possible causes of heterogeneity among study results (e.g. subgroup analysis, meta-regression). | Methods section, “Statistical Analysis” |
| 13f | Describe any sensitivity analyses conducted to assess robustness of the synthesized results. | Methods section, “Statistical Analysis” |
| Reporting bias assessment | 14 | Describe any methods used to assess risk of bias due to missing results in a synthesis (arising from reporting biases). | Results section, “Publication Bias” |
| Certainty assessment | 15 | Describe any methods used to assess certainty (or confidence) in the body of evidence for an outcome. | Methods section, “Quality Assessment” |
| **RESULTS** | | |  |
| Study selection | 16a | Describe the results of the search and selection process, from the number of records identified in the search to the number of studies included in the review, ideally using a flow diagram. | Results section, “Study Selection” + Figure 1 |
| 16b | Cite studies that might appear to meet the inclusion criteria, but which were excluded, and explain why they were excluded. | Results section, “Study Selection” + Figure 1 |
| Study characteristics | 17 | Cite each included study and present its characteristics. | Results section, “Study Characteristics” + Table 1 |
| Risk of bias in studies | 18 | Present assessments of risk of bias for each included study. | Results section, “Risk of Bias Assessment” + Figure 2 |
| Results of individual studies | 19 | For all outcomes, present, for each study: (a) summary statistics for each group (where appropriate) and (b) an effect estimate and its precision (e.g. confidence/credible interval), ideally using structured tables or plots. | Results section, “Overall Mortality” + Figures 3a, 4a, 5a |
| Results of syntheses | 20a | For each synthesis, briefly summarise the characteristics and risk of bias among contributing studies. | Results section, “Study Characteristics” + Table 1 和 “Risk of Bias Assessment” + Figure 2 |
| 20b | Present results of all statistical syntheses conducted. If meta-analysis was done, present for each the summary estimate and its precision (e.g. confidence/credible interval) and measures of statistical heterogeneity. If comparing groups, describe the direction of the effect. | Results section, “Overall Mortality” + Figure 3a, 5a |
| 20c | Present results of all investigations of possible causes of heterogeneity among study results. | Results section, “Overall Mortality” + Figure 3c |
| 20d | Present results of all sensitivity analyses conducted to assess the robustness of the synthesized results. | Results section, “Sensitivity Analysis” + Figure 3b |
| Reporting biases | 21 | Present assessments of risk of bias due to missing results (arising from reporting biases) for each synthesis assessed. | Results section, “Publication Bias” + Figure 6 |
| Certainty of evidence | 22 | Present assessments of certainty (or confidence) in the body of evidence for each outcome assessed. | Conclusion section |
| **DISCUSSION** | | |  |
| Discussion | 23a | Provide a general interpretation of the results in the context of other evidence. | Discussion section,Paragraph 1 |
| 23b | Discuss any limitations of the evidence included in the review. | Discussion section, “Limitations” |
| 23c | Discuss any limitations of the review processes used. | Discussion section, “Limitations” |
| 23d | Discuss implications of the results for practice, policy, and future research. | Discussion section, “Implications” |
| **OTHER INFORMATION** | | |  |
| Registration and protocol | 24a | Provide registration information for the review, including register name and registration number, or state that the review was not registered. | Methods section,Paragraph 1 |
| 24b | Indicate where the review protocol can be accessed, or state that a protocol was not prepared. | Title Page,Declarations section |
| 24c | Describe and explain any amendments to information provided at registration or in the protocol. | Title Page,Declarations section |
| Support | 25 | Describe sources of financial or non-financial support for the review, and the role of the funders or sponsors in the review. | Title Page,Declarations section |
| Competing interests | 26 | Declare any competing interests of review authors. | Title Page,Declarations section |
| Availability of data, code and other materials | 27 | Report which of the following are publicly available and where they can be found: template data collection forms; data extracted from included studies; data used for all analyses; analytic code; any other materials used in the review. | Title Page,Declarations section |

*From:*  Page MJ, McKenzie JE, Bossuyt PM, Boutron I, Hoffmann TC, Mulrow CD, et al. The PRISMA 2020 statement: an updated guideline for reporting systematic reviews. BMJ 2021;372:n71. doi: 10.1136/bmj.n71. This work is licensed under CC BY 4.0. To view a copy of this license, visit <https://creativecommons.org/licenses/by/4.0/>
