# Supplementary material for: Effect of Thiamine Supplementation on Mortality in Septic Patients: A Meta-Analysis of Randomized Controlled Trials
Source: Research Square preprint supplement (doi:10.21203/rs.3.rs-6639223/v1), 2025-06-10
Supplement: Supplementary file 2 [file e147c1b78d16ed3c3cc1416f.docx]

("thiamine"[MeSH Terms] OR "thiamine"[All Fields] OR "vitamin b1"[All Fields] OR "thiamin"[All Fields])

AND

("sepsis"[MeSH Terms] OR "sepsis"[All Fields] OR "septic shock"[MeSH Terms] OR "septic shock"[All Fields] OR "severe sepsis"[All Fields])

AND

("mortality"[MeSH Terms] OR "mortality"[All Fields] OR "death"[MeSH Terms] OR "death"[All Fields] OR "survival"[All Fields])

AND

("randomized controlled trial"[Publication Type] OR "randomized controlled trials as topic"[MeSH Terms] OR "rct"[All Fields] OR "random allocation"[MeSH Terms])
